# Supplementary material for: A Genome-Wide Screen Identifies Yeast Genes Required for Tolerance to Technical Toxaphene, an Organochlorinated Pesticide Mixture
Source: PubMed Central journal article supplement (PMC3832591; doi:10.1371/journal.pone.0081253), 2013-11-18
Supplement: pone.0081253.s002.pdf [file pone.0081253.s002.pdf]

**Table S1. Oligos for quantitative PCR in chromatin immunoprecipitation experiments.**

| <b>Primer Name</b> | <b>Sequence</b>               |
|--------------------|-------------------------------|
| 1_100.txt-3F       | GATGTTCCGATTAATGTTCTACTGTACAA |
| 1_100-66R          | GCTCCATAAGAAAGTCACTGCAA       |
| 1900-2000-3F       | AGACAGAAGGAAATTTACCAAGCG      |
| 1900-2000-63R      | AATCGAAAAAATCAGGTAGTTGCTG     |
| 3800-4100-191F     | GATATGCTTCAATCCGACAGAGAG      |
| 3800-4100-258R     | TCAACAGTTACCGATGGTATTAAAGG    |
| 5800-6100-2F       | AGCCGGACAAACAGAACAGC          |
| 5800-6100-71R      | CAGGGTCTTTTTGGTGTTC           |
| 7600_7700.txt-21F  | GTTGGACAATCTTAAAGTCGGGA       |
| 7600_7700.txt-92R  | GTTGGACAATCTTAAAGTCGGGA       |
