# Supplementary material for: A Genome-Wide Screen Identifies Yeast Genes Required for Tolerance to Technical Toxaphene, an Organochlorinated Pesticide Mixture
Source: PubMed Central journal article supplement (PMC3832591; doi:10.1371/journal.pone.0081253), 2013-11-18
Supplement: pone.0081253.s004.pdf [file pone.0081253.s004.pdf]

**Table S3. Mutants displaying sensitivity to both toxaphene and MPA, 6-AU, or 4-NQO.**

| Transcription elongation mutants |                |       |       | Nutrient utilization mutants |                |      |       |
|----------------------------------|----------------|-------|-------|------------------------------|----------------|------|-------|
| Toxaphene-sensitive strain       | Sensitivity to |       |       | Toxaphene-sensitive strain   | Sensitivity to |      |       |
|                                  | MPA            | 6-AU  | 4-NQO |                              | MPA            | 6-AU | 4-NQO |
| <i>hpr1</i> Δ                    | 2              | 2     |       | <i>dal81</i> Δ               | 2, 7           |      |       |
| <i>mfi1</i> Δ                    | 7              |       |       | <i>stp1</i> Δ                | 2, 10          | 10   |       |
| <i>tho2</i> Δ                    | 4              |       | 4     | <i>ure2</i> Δ                | 4              |      |       |
| <i>dst1</i> Δ                    | 2, 4, 6, 7     | 2, 10 |       | <i>ira2</i> Δ                | 2              |      |       |
| <i>spt4</i> Δ                    | 4              | 9     | 4     |                              |                |      |       |
| <i>cdc73</i> Δ                   | 4              |       | 4     |                              |                |      |       |
| <i>rtf1</i> Δ                    | 2, 4           | 2     |       |                              |                |      |       |
| <i>spt20</i> Δ                   | 3, 4           | 2     | 4     |                              |                |      |       |
| <i>sac3</i> Δ                    | 2              |       |       |                              |                |      |       |
| <i>thp1</i> Δ                    | 10             | 10    |       |                              |                |      |       |
| <i>ctk3</i> Δ                    | 4              | 2     | 4     |                              |                |      |       |
| <i>rad6</i> Δ                    | 2, 4           |       | 4     |                              |                |      |       |
| <i>rpb9</i> Δ                    | 1, 4, 5        |       | 4     |                              |                |      |       |
| <i>snf6</i> Δ                    | 2, 4           | 2     |       |                              |                |      |       |
| <i>ubp3</i> Δ                    | 7, 10          | 8, 10 |       |                              |                |      |       |
| <i>mot3</i> Δ                    | 2              | 2, 10 |       |                              |                |      |       |

A literature search was conducted to identify overlapping mutant sensitivities between toxaphene, the GMP synthesis inhibitors mycophenolic acid (MPA) and 6-azauracil (6-AU), and the model carcinogen 4-nitroquinoline-N-oxide (4-NQO). Numbers indicate the references cited below.

1. Betz, J. L., Chang, M., Washburn, T. M., Porter, S. E., Mueller, C. L., Jaehning, J. A. (2002). Phenotypic analysis of Paf1/RNA polymerase II complex mutations reveals connections to cell cycle regulation, protein synthesis, and lipid and nucleic acid metabolism. *Mol. Genet. Genomics*. **268**, 272–285.
2. Desmoucelles, C., Pinson, B., Saint-Marc, C., Daignan-Fornier, B. (2002). Screening the yeast “disruptome” for mutants affecting resistance to the immunosuppressive drug, mycophenolic acid. *J. Biol. Chem.* **277**, 27036–27044.
3. Dudley, A. M., Janse, D. M., Tanay, A., Shamir, R., Church, G. M. (2005). A global view of pleiotropy and phenotypically derived gene function in yeast. *Mol. Syst. Biol.* **1**, 2005.0001.
4. Gaillard, H., Wellinger, R. E., Aguilera, A. (2007). A new connection of mRNP biogenesis and export with transcription-coupled repair. *Nucleic Acids Res.* **35**, 3893–3906.
5. Gibney, P. A., Fries, T., Bailer, S. M., Morano, K. A. (2008). Rtr1 is the *Saccharomyces cerevisiae* homolog of a novel family of RNA polymerase II-binding proteins. *Eukaryotic Cell*. **7**, 938–948.
6. Gómez-Herreros, F., De Miguel-Jiménez, L., Morillo-Huesca, M., Delgado-Ramos, L., Muñoz-Centeno, M. C., Chávez, S. (2012). TFIIIS is required for the balanced expression of the genes encoding ribosomal components under transcriptional stress. *Nucleic Acids Res.* **40**, 6508–6519.
7. Kapitzky, L., Beltrao, P., Berens, T. J., Gassner, N., Zhou, C., Wüster, A., Wu, J., Babu, M. M., Elledge, S. J., Toczycki, D., Lokey, R. S., Krogan, N. J. (2010). Cross-species chemogenomic profiling reveals evolutionarily conserved drug mode of action. *Mol. Syst. Biol.* **6**, 451.
8. McCulloch, S., Kinard, T., McCullough, L., Formosa, T. (2006). *blm3-1* is an allele of UBP3, a ubiquitin protease that appears to act during transcription of damaged DNA. *J. Mol. Biol.* **363**, 660–672.
9. Morillon, A., O’Sullivan, J., Azad, A., Proudfoot, N., Mellor, J. (2003). Regulation of elongating RNA polymerase II by forkhead transcription factors in yeast. *Science*. **300**, 492–495.
10. Riles, L., Shaw, R. J., Johnston, M., Reines, D. (2004). Large-scale screening of yeast mutants for sensitivity to the IMP dehydrogenase inhibitor 6-azauracil. *Yeast*. **21**, 241–248.
